# Supplementary material
Source: ML conference proceedings conference paper supplement (https://openreview.net/forum?id=x4W8P7ybTE)

(a) Symbolic representation of clinical reasoning in blood cancer diagnosis

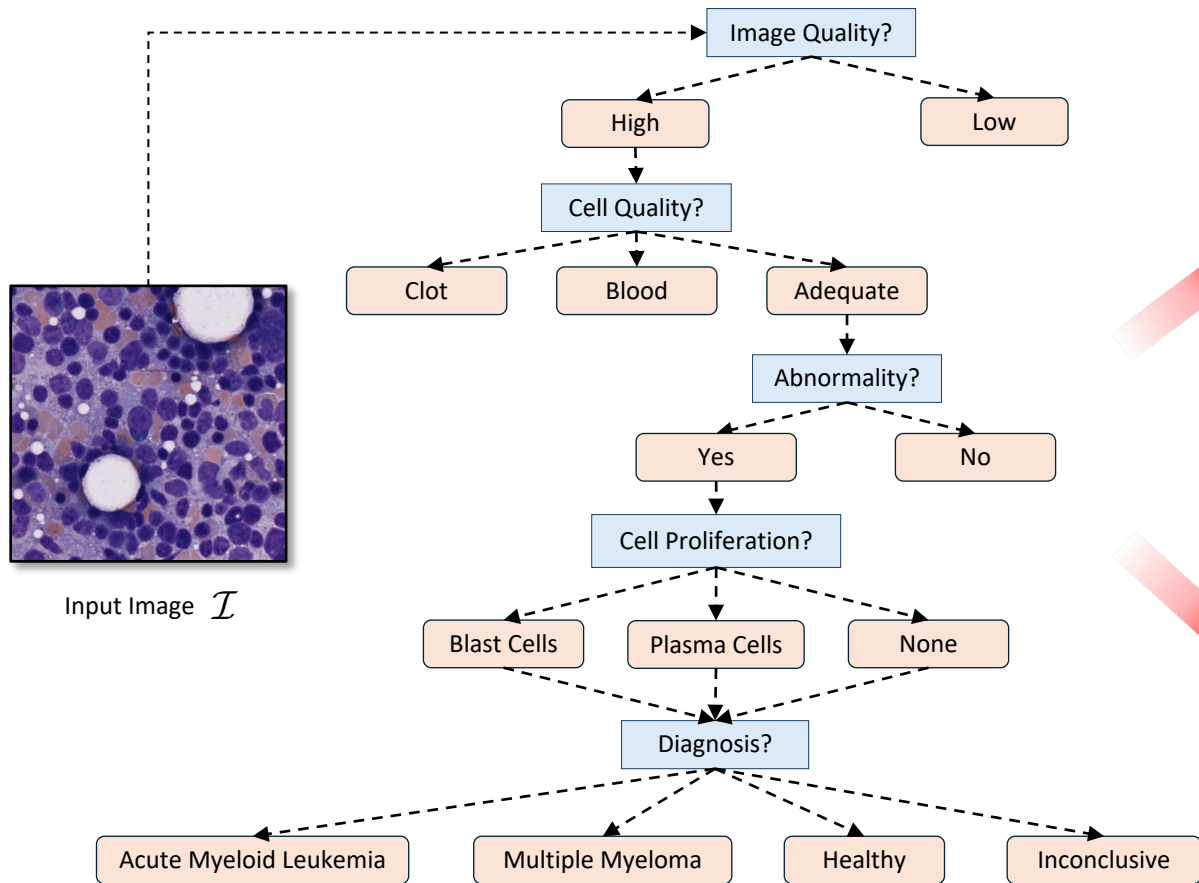

(b) Symbolic rules for generating and evaluating validity of clinical reasoning processes

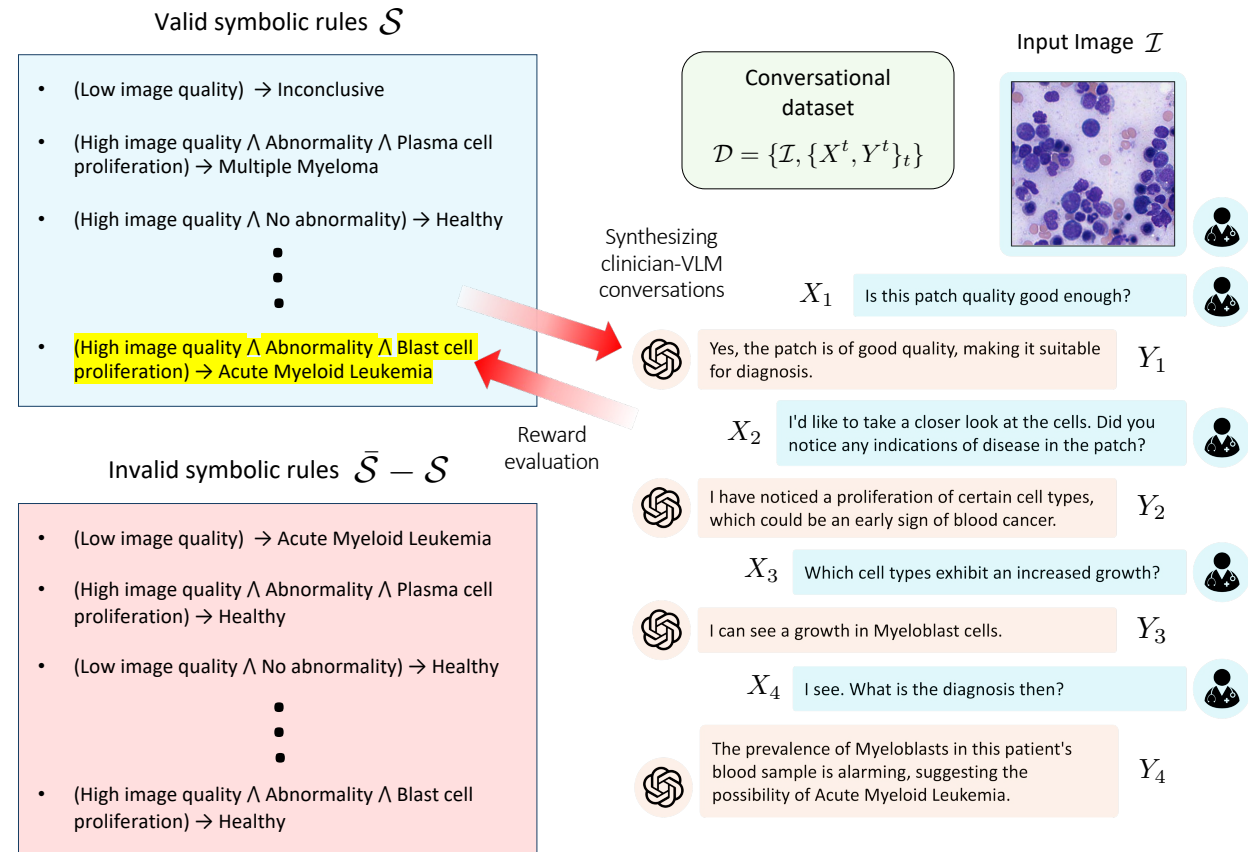

Supplement: supplementary_material [file attachment]
